# Supplementary material for: A gH/gL-encoding replicon vaccine elicits neutralizing antibodies that protect humanized mice against EBV challenge
Source: PubMed Central journal article supplement (PMC11208421; doi:10.1038/s41541-024-00907-y), 2024-06-26
Supplement: 41541_2024_907_MOESM1_ESM.pdf [file 41541_2024_907_MOESM1_ESM.pdf]

**Supplementary Table 1: Statistical analyses for data shown in Figure 2.**

| <b>ELISA</b>                              | <b>0</b> | <b>2</b> | <b>4</b> | <b>6</b> | <b>8</b> | <b>10</b> | <b>12</b> | <b>14</b> | <b>18</b> | <b>26</b> | <b>32</b> |
|-------------------------------------------|----------|----------|----------|----------|----------|-----------|-----------|-----------|-----------|-----------|-----------|
| 1 µg/1 µg                                 | ND       | 0.004    | 0.0286   | 0.1143   | 0.0162   | 0.004     | 0.0286    | 0.0286    | 0.004     | ND        | ND        |
| 0.1 µg/<br>0.1 µg                         | ND       | 0.0002   | 0.004    | 0.004    | 0.0002   | 0.0006    | 0.004     | 0.004     | 0.0002    | ND        | ND        |
| 10 µg/<br>0.1 µg                          | ND       | ND       | ND       | ND       | 0.2844   | 0.0016    | 0.0159    | 0.0159    | NA        | 0.1905    | 0.1111    |
| 10 µg/<br>1 µg                            | ND       | ND       | ND       | ND       | 0.2844   | 0.0016    | 0.0159    | 0.0159    | NA        | 0.1111    | 0.0571    |
| 0.1 µg/<br>10 µg                          | ND       | ND       | ND       | ND       | 0.004    | 0.004     | 0.2       | 0.0286    | NA        | 0.4857    | 0.6286    |
| <b>Epithelial Cell<br/>Neutralization</b> | <b>0</b> | <b>2</b> | <b>4</b> | <b>6</b> | <b>8</b> | <b>10</b> | <b>12</b> | <b>14</b> | <b>18</b> | <b>26</b> | <b>32</b> |
| 1 µg/1 µg                                 | ND       | 0.004    | 0.2      | 0.2      | 0.0162   | 0.004     | 0.0286    | 0.0286    | 0.004     | ND        | ND        |
| 0.1 µg/<br>0.1 µg                         | ND       | 0.004    | 0.1143   | 0.1143   | 0.0081   | 0.0081    | 0.0286    | 0.0286    | 0.004     | ND        | ND        |
| 10 µg/<br>0.1 µg                          | ND       | ND       | ND       | ND       | 0.0451   | 0.0016    | 0.0159    | 0.0159    | ND        | 0.0159    | 0.0286    |
| 10 µg/<br>1 µg                            | ND       | ND       | ND       | ND       | 0.0109   | 0.0016    | 0.0159    | 0.0159    | ND        | 0.0159    | 0.0159    |
| 0.1 µg/<br>10 µg                          | ND       | ND       | ND       | ND       | 0.004    | 0.004     | 0.0286    | 0.1143    | ND        | 0.0286    | 0.0571    |
| <b>B Cell<br/>Neutralization</b>          | <b>0</b> | <b>2</b> | <b>4</b> | <b>6</b> | <b>8</b> | <b>10</b> | <b>12</b> | <b>14</b> | <b>18</b> | <b>26</b> | <b>32</b> |
| 1 µg/1 µg                                 | ND       | 0.2081   | >0.9999  | 0.1429   | 0.0485   | 0.004     | 0.0286    | 0.0286    | 0.004     | ND        | ND        |
| 0.1 µg/<br>0.1 µg                         | ND       | 0.2081   | >0.9999  | 0.1429   | 0.0485   | 0.004     | 0.0286    | 0.0286    | 0.004     | ND        | ND        |
| 10 µg/<br>0.1 µg                          | ND       | ND       | ND       | ND       | 0.2059   | 0.0016    | 0.0556    | 0.0159    | ND        | 0.0286    | 0.0286    |
| 10 µg/<br>1 µg                            | ND       | ND       | ND       | ND       | 0.2059   | 0.0016    | 0.0556    | 0.0159    | ND        | 0.0159    | 0.0286    |
| 0.1 µg/<br>10 µg                          | ND       | ND       | ND       | ND       | 0.0264   | 0.004     | 0.0159    | 0.0286    | ND        | 0.0286    | 0.0571    |

Titers at individual timepoints were compared to the 10 µg/10 µg LION/repRNA gH/gL group and summarized above. Significance was calculated by Mann-Whitney test. ND – Not Done. Two-tailed p values shown in table.

**Supplementary Table 2: Statistical analyses for data shown in Figure 4.**

| <b>ELISA</b>                          | <b>0</b> | <b>2</b> | <b>4</b> | <b>6</b> | <b>8</b> | <b>10</b> | <b>12</b> | <b>14</b> | <b>18</b> | <b>22/23</b> | <b>32/34</b> |
|---------------------------------------|----------|----------|----------|----------|----------|-----------|-----------|-----------|-----------|--------------|--------------|
| 4-mer                                 | ND       | 0.3543   | >0.9999  | >0.9999  | 0.7242   | 0.3543    | 0.4127    | 0.0635    | 0.3543    | 0.0635       | 0.0317       |
| C4b (7-mer)                           | ND       | 0.0653   | 0.4127   | 0.1905   | 0.0451   | 0.1709    | 0.2857    | 0.1905    | 0.6216    | 0.0635       | 0.0317       |
| I3 (60-mer)                           | ND       | 0.7242   | >0.9999  | 0.5556   | 0.2844   | 0.0031    | 0.0317    | 0.0159    | 0.004     | 0.0286       | 0.0286       |
| <b>Epithelial Cell Neutralization</b> | <b>0</b> | <b>2</b> | <b>4</b> | <b>6</b> | <b>8</b> | <b>10</b> | <b>12</b> | <b>14</b> | <b>18</b> | <b>22/23</b> | <b>32/34</b> |
| 4-mer                                 | ND       | 0.0653   | 0.1111   | 0.0317   | 0.1709   | 0.0295    | 0.0317    | 0.5556    | 0.0186    | 0.0159       | 0.0159       |
| C4b (7-mer)                           | ND       | 0.2844   | 0.2857   | 0.0079   | 0.0451   | 0.0016    | 0.0159    | 0.0159    | 0.0062    | 0.0159       | 0.0159       |
| I3 (60-mer)                           | ND       | 0.0186   | 0.0571   | 0.0159   | 0.0031   | 0.0031    | 0.0159    | 0.0159    | 0.0162    | 0.0571       | 0.0286       |
| <b>B Cell Neutralization</b>          | <b>0</b> | <b>2</b> | <b>4</b> | <b>6</b> | <b>8</b> | <b>10</b> | <b>12</b> | <b>14</b> | <b>18</b> | <b>22/23</b> | <b>32/34</b> |
| 4-mer                                 | ND       | 0.1608   | >0.9999  | 0.127    | 0.0264   | 0.0016    | 0.0317    | 0.0317    | 0.3543    | 0.0159       | 0.0159       |
| C4b (7-mer)                           | ND       | 0.1608   | 0.4444   | 0.9762   | 0.0505   | 0.0016    | 0.0159    | 0.0317    | 0.0016    | 0.0635       | 0.0159       |
| I3 (60-mer)                           | ND       | 0.1608   | 0.4444   | 0.0476   | 0.0264   | 0.0016    | 0.0159    | 0.0159    | 0.004     | 0.0286       | 0.0286       |

Titers at individual timepoints were compared to the 10 µg/10 µg LION/repRNA encoded full length gH/gL group and summarized above. Significance was calculated by Mann-Whitney test. ND – Not Done, two-tailed p values shown in table. Week 22 post-immunization of the 10 µg/10 µg LION/repRNA encoded full-length gH/gL was compared to week 23 of the multimer groups, and week 32 compared to week 34.

**Supplementary Table 3: Summary of results from EBV challenge of humanized mice after passive transfer of vaccine elicited IgG.**

| Mouse | Group       | Post-transfer IgG endpoint | Post-transfer gHgL binding endpoint | Viral titer in blood at euthanasia (viral copies/ $\mu$ l blood) | Week first positive for BALF5 | Survival (weeks) | Spleen viral load | Spleen weight (mg) |
|-------|-------------|----------------------------|-------------------------------------|------------------------------------------------------------------|-------------------------------|------------------|-------------------|--------------------|
| 846   | PBS         | N/A                        | N/A                                 | 0.625                                                            | N/A                           | 12               | 0.625             | 145                |
| 847   | PBS         | N/A                        | N/A                                 | 0.625                                                            | N/A                           | 12               | 0.625             | 60                 |
| 848   | PBS         | N/A                        | N/A                                 | 0.625                                                            | N/A                           | 12               | 2.274             | 61                 |
| 849   | PBS         | N/A                        | N/A                                 | 0.625                                                            | N/A                           | 12               | 0.895             | 58                 |
| 836   | Protein     | 1.012E+06                  | 2.278E+04                           | 0.625                                                            | N/A                           | 12               | 3.377             | 88                 |
| 837   | Protein     | 2.273E+05                  | 7.164E+04                           | 30.936                                                           | 12                            | 12               | 72.813            | 240                |
| 838   | Protein     | 1.446E+05                  | 3.487E+04                           | 1.510                                                            | 7                             | 12               | 106.522           | 45                 |
| 839   | Protein     | 1.291E+05                  | 3.778E+04                           | 2357.039                                                         | 7                             | 8                | 502.856           | 194                |
| 840   | Protein     | 1.271E+05                  | 3.356E+03                           | 4855.516                                                         | 9                             | 9                | 815.711           | 259                |
| 831   | repRNA      | 2.679E+05                  | 3.905E+05                           | 0.625                                                            | N/A                           | 12               | 0.724             | 65                 |
| 832   | repRNA      | 1.986E+05                  | 3.218E+05                           | 0.625                                                            | N/A                           | 12               | 0.678             | 68                 |
| 833   | repRNA      | 3.011E+05                  | 3.763E+05                           | 0.625                                                            | 4                             | 12               | 2.119             | 81                 |
| 834   | repRNA      | 2.192E+05                  | 3.905E+05                           | 0.625                                                            | 8                             | 12               | 0.625             | 31                 |
| 851   | Control IgG | 1.610E+05                  | N/A                                 | 10.727                                                           | 5                             | 5                | 207.571           | 200                |
| 852   | Control IgG | 1.116E+05                  | N/A                                 | 8673.307                                                         | 6                             | 8                | 1926.007          | 301                |
| 853   | Control IgG | 1.942E+05                  | N/A                                 | 9.461                                                            | 8                             | 8                | 191.058           | 133                |
| 854   | Control IgG | 2.049E+05                  | N/A                                 | 202.075                                                          | 7                             | 8                | 542.984           | 245                |
| 856   | Control IgG | 2.408E+05                  | N/A                                 | 156.191                                                          | 5                             | 5                | 1069.962          | 166                |

Related to Figure 5. Summary of transferred IgG, viral titers, spleen weight, and survival for each individual mouse.

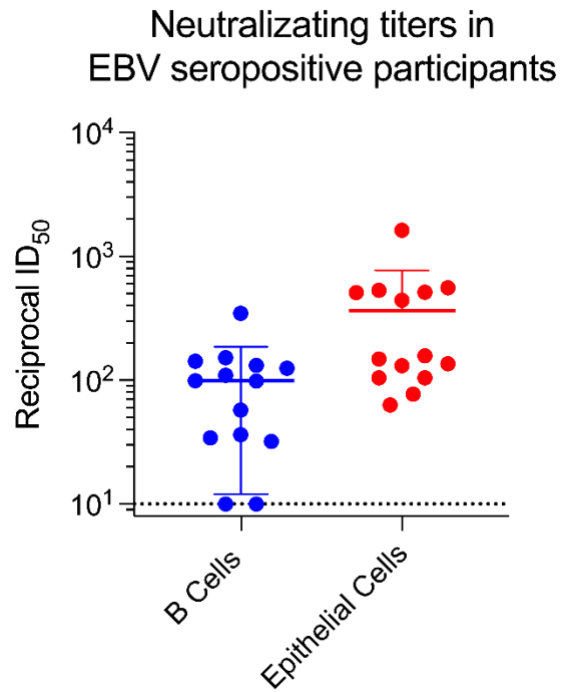

**Supplementary Figure 1. The ability of sera from EBV seropositive donors to neutralize EBV infection of B cells or epithelial cells as indicated.** Each dot represents the reciprocal half-maximal inhibitory concentration of an individual donor (n=14) measured in duplicate. Bars represent the mean. Dashed line indicates the lowest serum dilution tested.

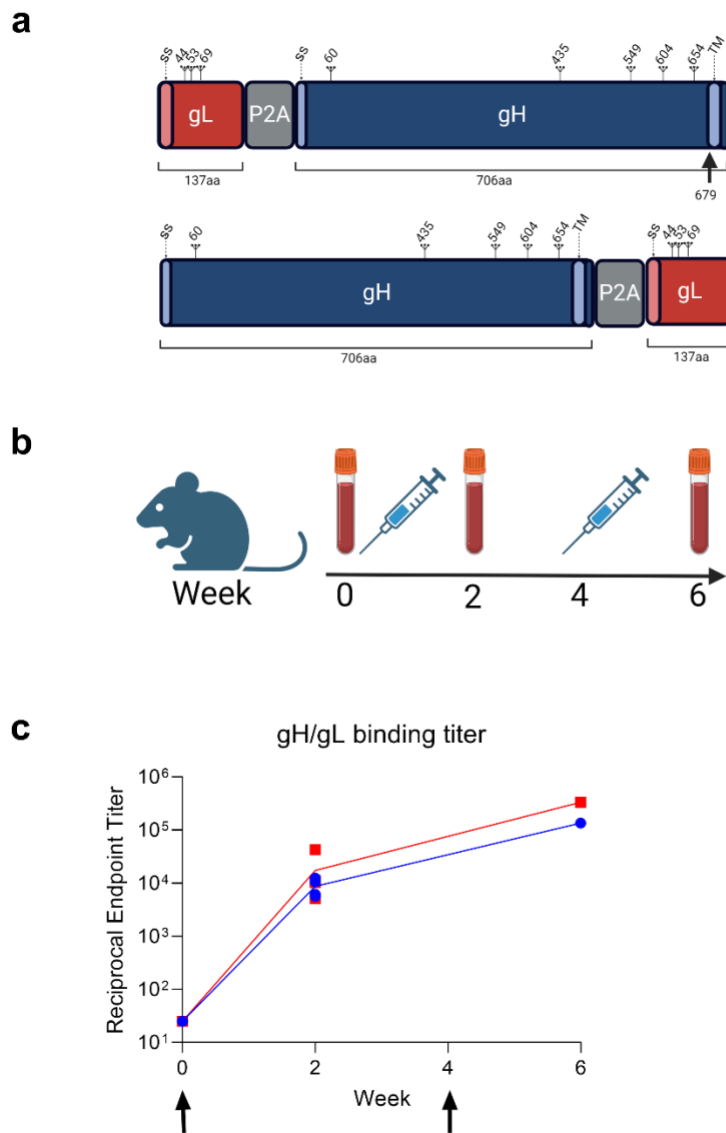

**Supplementary Figure 2. Immunogenicity of repRNAs encoding EBV gH/gL in two orientations.** (a) schematic depicting the two repRNA inserts encoding gH and gL separated by a P2A peptide with the order swapped. The boundary of the gH ectodomain at amino acid 679 is indicated on the top representation. (b) Immunization schedule in C57BL/6 mice. (c) Reciprocal endpoint gH/gL binding titers were measured in plasma by ELISA. Each dot represents an individual mouse (n=4) at weeks 0 and 2, or pooled sera from the same 4 mice at week 6. The lines connect the mean (or value of pooled sera) across the tested timepoints. Arrows indicate time of immunization. Panels a and b created with BioRender.com.

gH/gL binding of harvested IgG  
pre-transfer

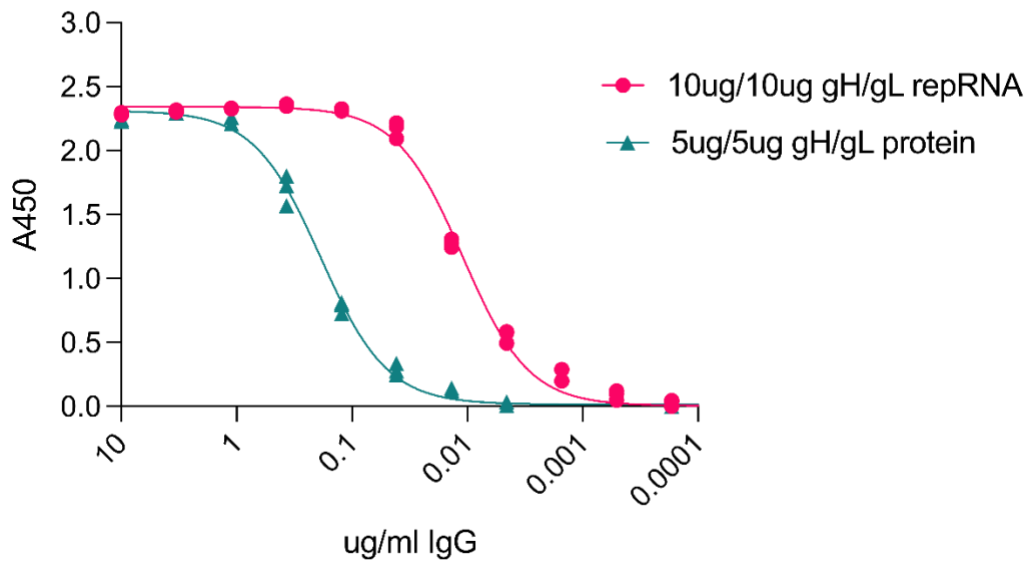

**Supplementary Figure 3: gH/gL binding of purified IgG after two immunizations with full length gH/gL encoded by repRNA or the recombinant gH/gL ectodomain as indicated.** gH/gL binding was measured for each purified IgG in triplicate. The purified IgG was used for transfer experiments in Figure 5.

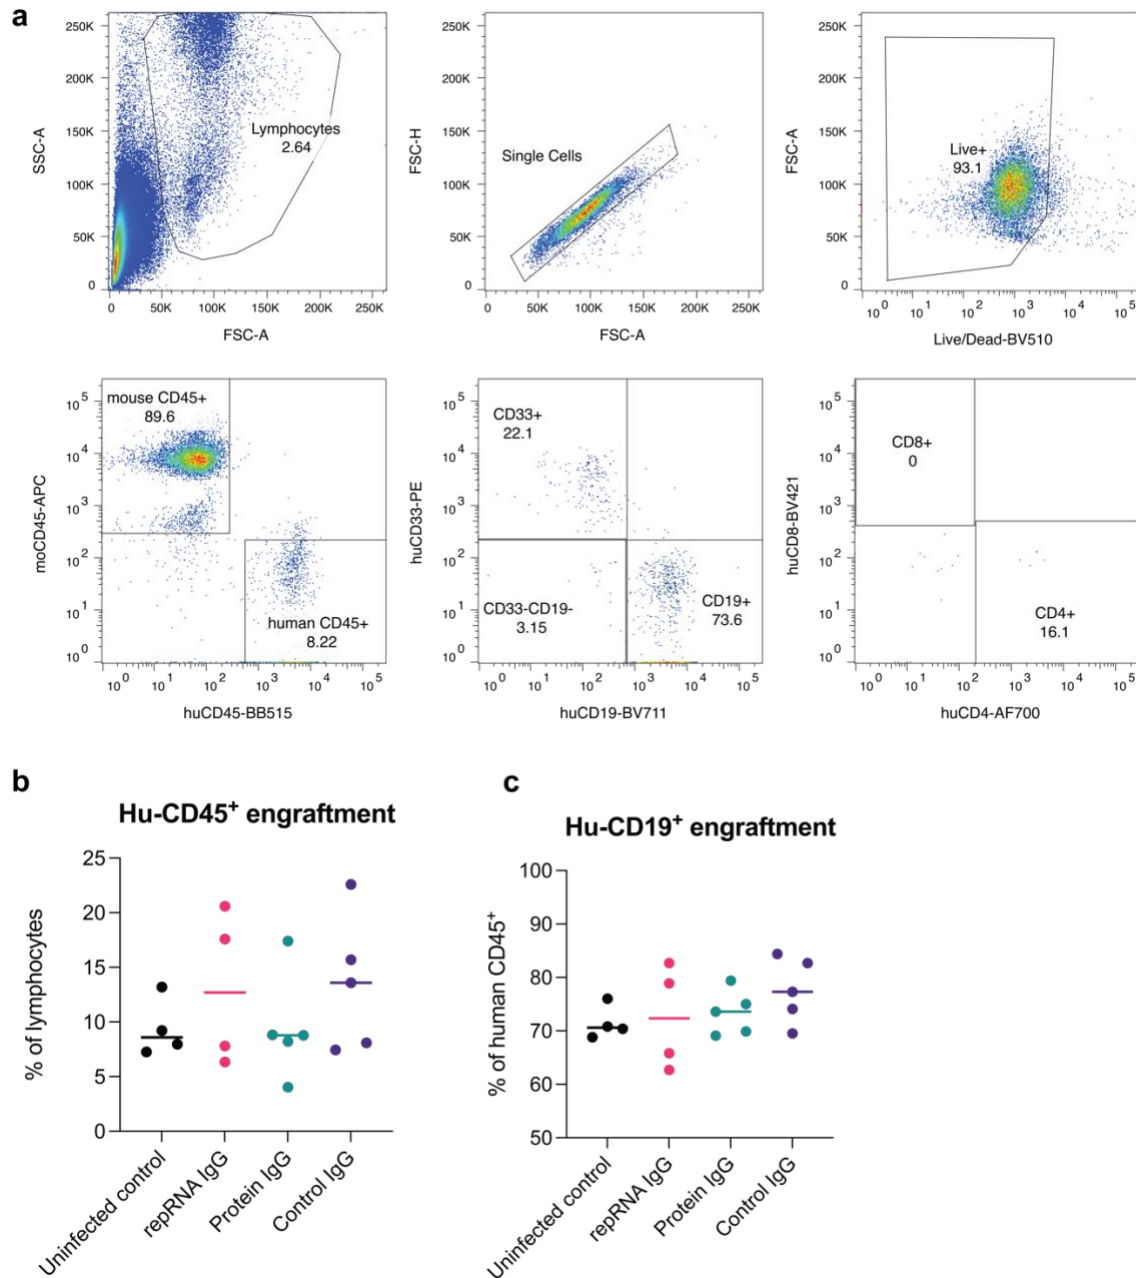

**Supplementary Figure 4: Cell engraftment in humanized mice used in Figure 5. (a)** Gating strategy to determine human CD45<sup>+</sup> cells within live single cell lymphocyte population as well as CD19<sup>+</sup> B cells within human CD45<sup>+</sup> cells. Representative plots from one mouse shown. **(b-c)** Frequency of human CD45<sup>+</sup> lymphocytes **(b)** and human CD19<sup>+</sup> B cells **(c)** in the mice assigned to the various treatment groups. n=5 for repRNA, uninfected control, and control IgG groups and n=4 for protein IgG group.

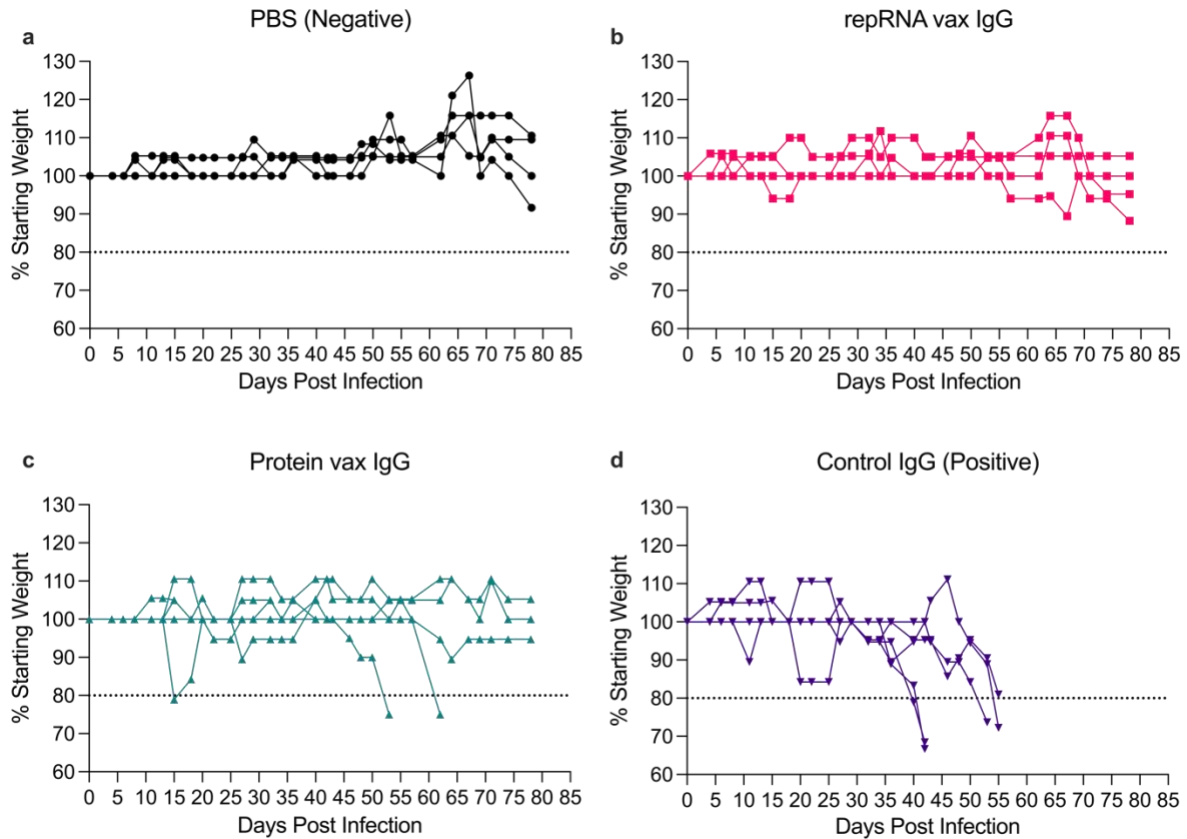

**Supplementary Figure 5: Weight of mice from Figure 5 after EBV challenge.** The percent of the starting weight over time for (a) uninfected control mice treated with PBS, (b) mice given IgG elicited by LION/repRNA-gH/gL prior to EBV challenge, (c) mice given IgG elicited by protein vaccination prior to challenge, and (d) mice given control IgG prior to challenge (positive control). Dashed line indicates threshold for humane endpoint.



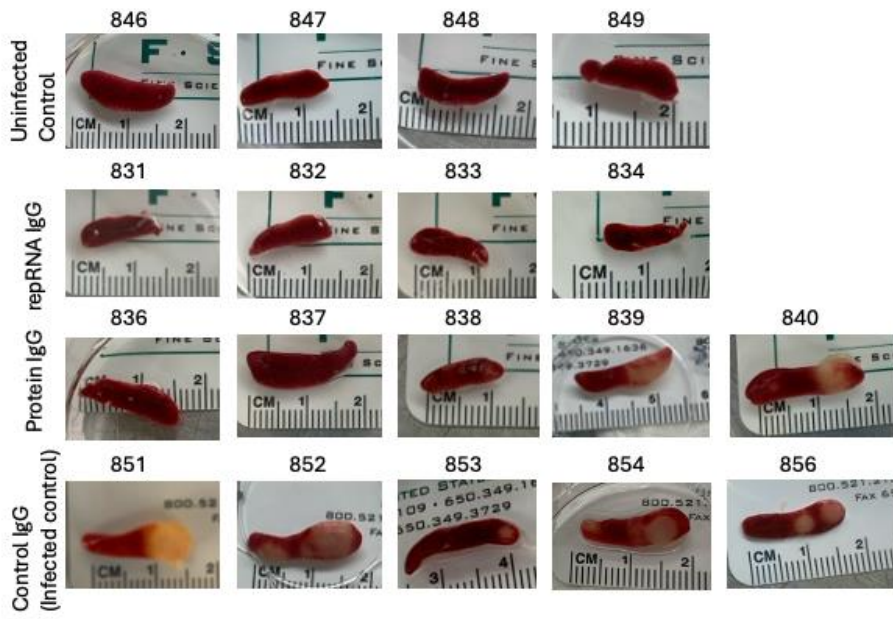

**Supplementary Figure 6: Splens from individual animals from Figure 5 collected at time of euthanasia.**

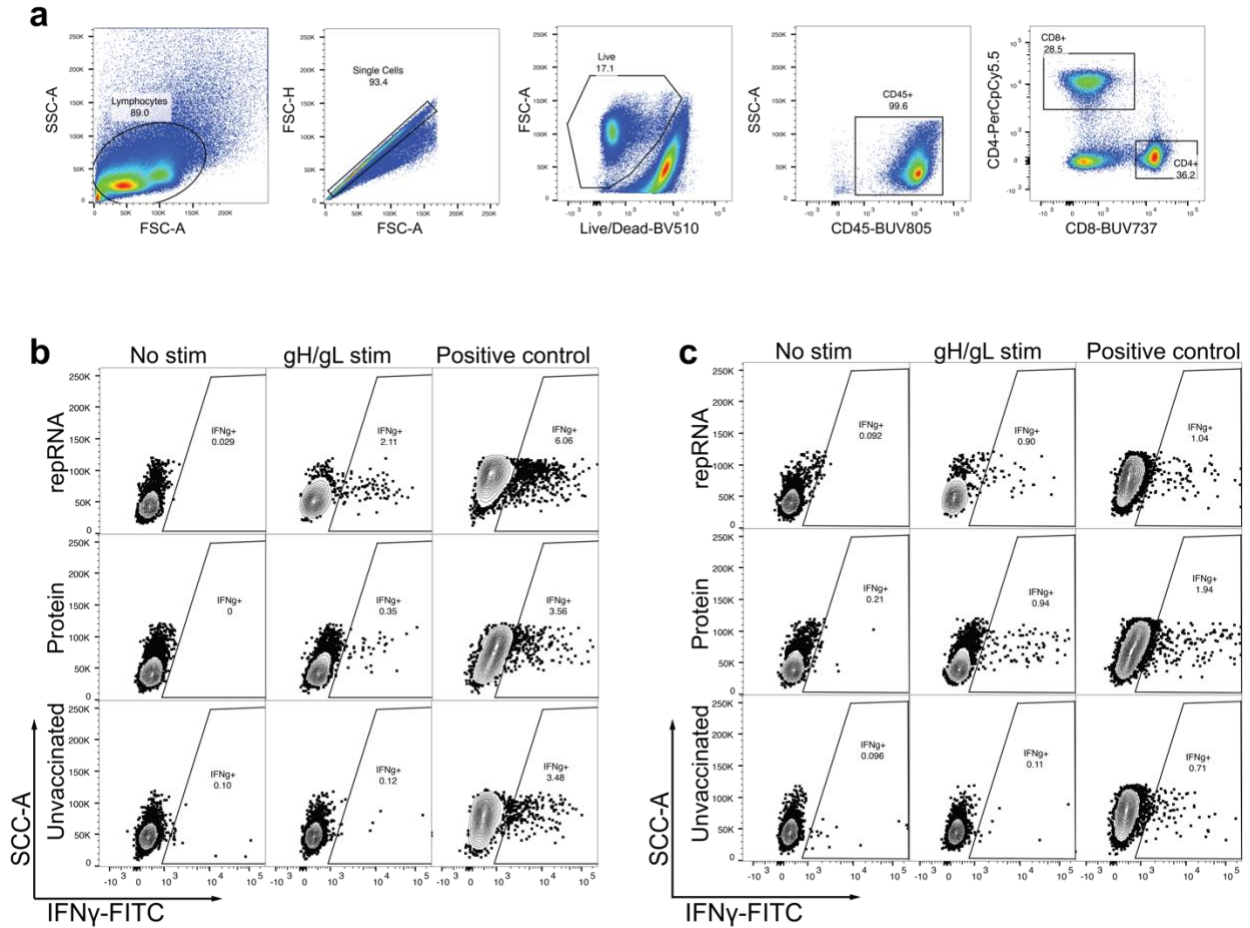

**Supplementary Figure 7: Gating strategy for evaluating IFN $\gamma$ <sup>+</sup> CD4<sup>+</sup> and CD8<sup>+</sup> T cells.**

Related to figure 6. (a) Gating strategy for CD4<sup>+</sup> and CD8<sup>+</sup> T cell populations. Representative data shown from one mouse. (b) IFN $\gamma$ <sup>+</sup> CD8<sup>+</sup> T cell populations for a representative repRNA immunized, protein immunized, and unimmunized animal after media only stimulation (negative control), gH/gL stimulation, and positive control simulation (anti-CD3/CD28) of splenocytes as indicated. (c) IFN $\gamma$ <sup>+</sup> staining within CD4<sup>+</sup> T cell populations for a representative repRNA immunized, protein immunized, and unimmunized animal after media only stimulation (negative control), gH/gL stimulation, and positive control simulation (anti-CD3/CD28) of splenocytes as indicated. Data from one representative mouse per immunization group is shown.
